# Supplementary material
Source: publisher figshare collection journal article supplement (https://acs.figshare.com/ndownloader/files/11354123)
Supplement: Supplementary file 1 [file 11354123]

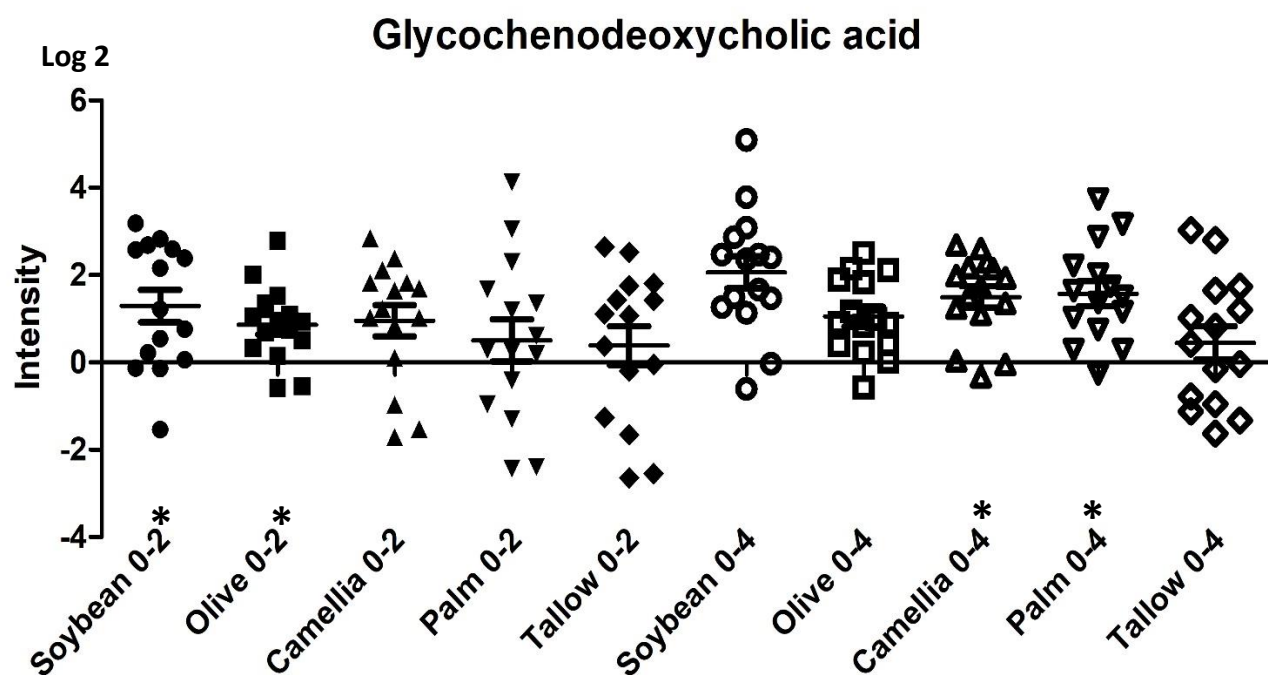

Supplemental Figure 1. Serum glycochenodeoxycholate differences between the control group (no oil added) and experimental groups (consuming various oils) after the test milkshake intake. \*P < 0.05; Wilcoxon sign- rank test.

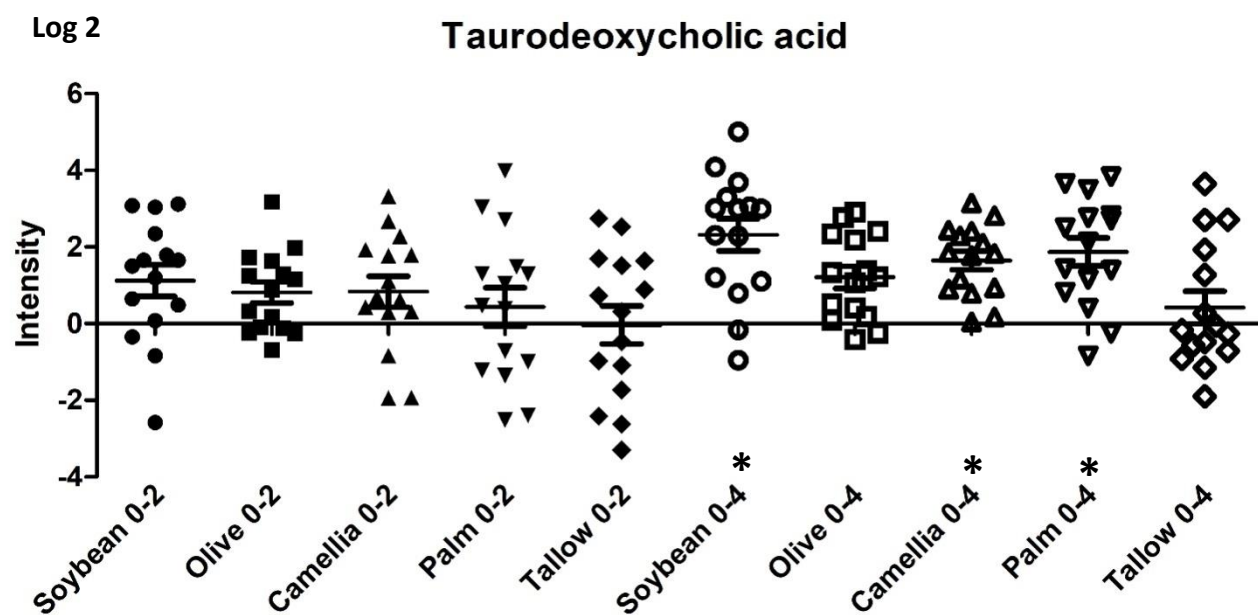

Supplemental Figure 2. Serum taurodeoxycholic acid differences between the control group (no oil added) and experimental groups (consuming various oils) after the test milkshake intake. \* $P < 0.05$ ; Wilcoxon sign- rank test.

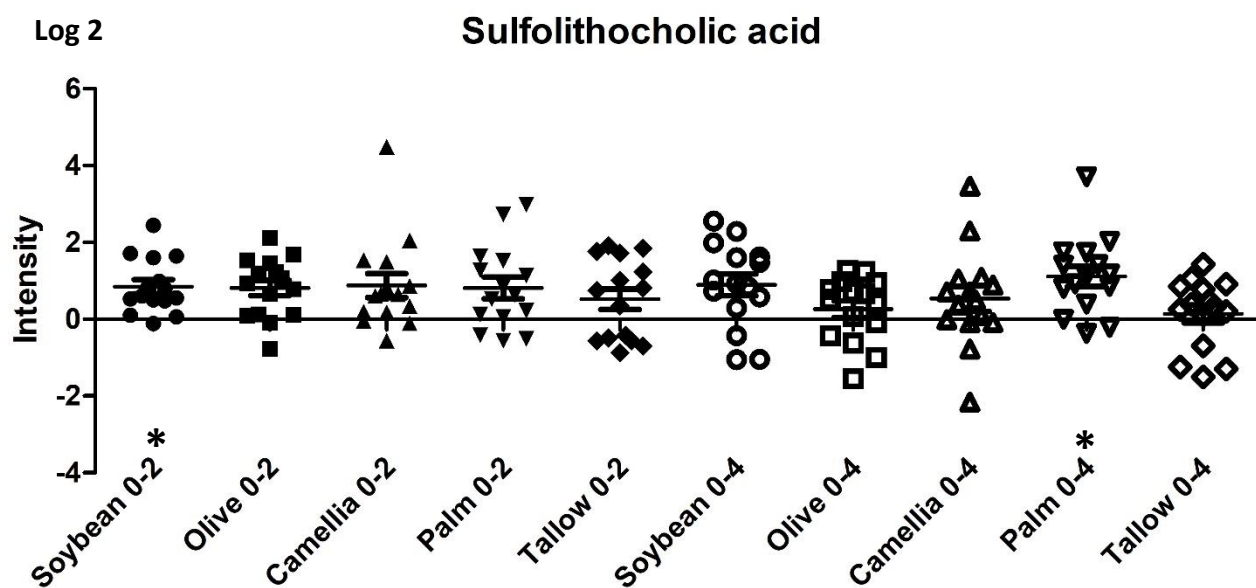

Supplemental Figure 3. Serum sulfolithocholic acid differences between the control group (no oil added) and experimental groups (consuming various oils) after the test milkshake intake. \* $P < 0.05$ ; Wilcoxon sign- rank test.

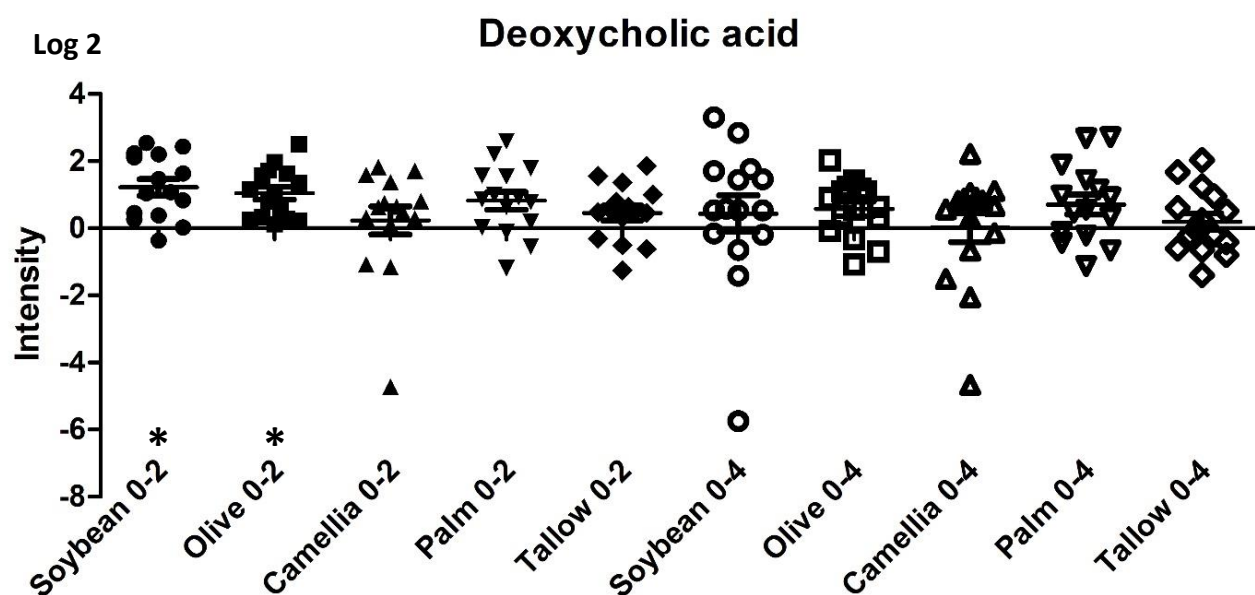

Supplemental Figure 4. Serum deoxycholic acid differences between the control group (no oil added) and experimental groups (consuming various oils) after the test milkshake intake (conc). \*P < 0.05; Wilcoxon sign- rank test.

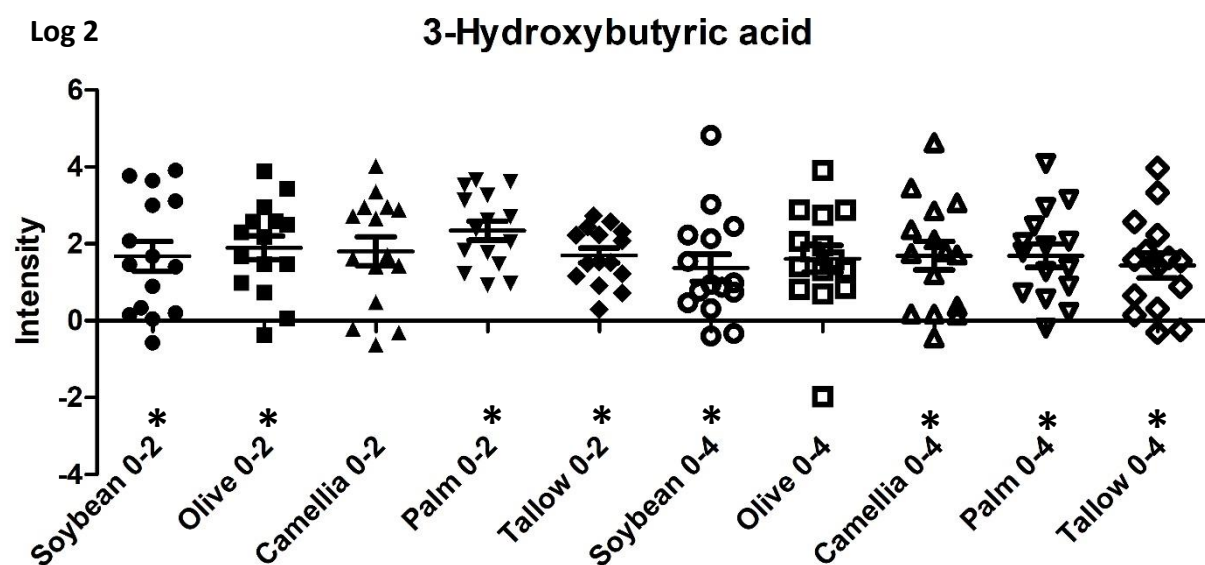

Supplemental Figure 5. Serum 3-hydroxybutyrate differences between the control group (no oil added) and experimental groups (consuming various oils) after the test milkshake intake (conc). \*P < 0.05; Wilcoxon sign- rank test.

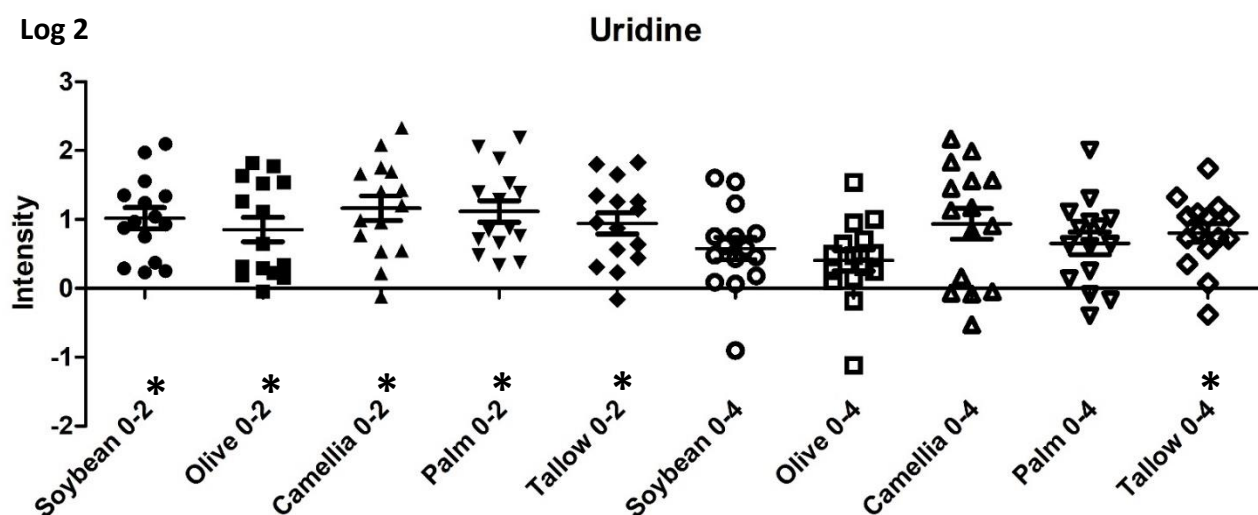

Supplemental Figure 6. Serum uridine differences between the control group (no oil added) and experimental groups (consuming various oils) after the test milkshake intake (conc). \*P < 0.05; Wilcoxon sign- rank test.

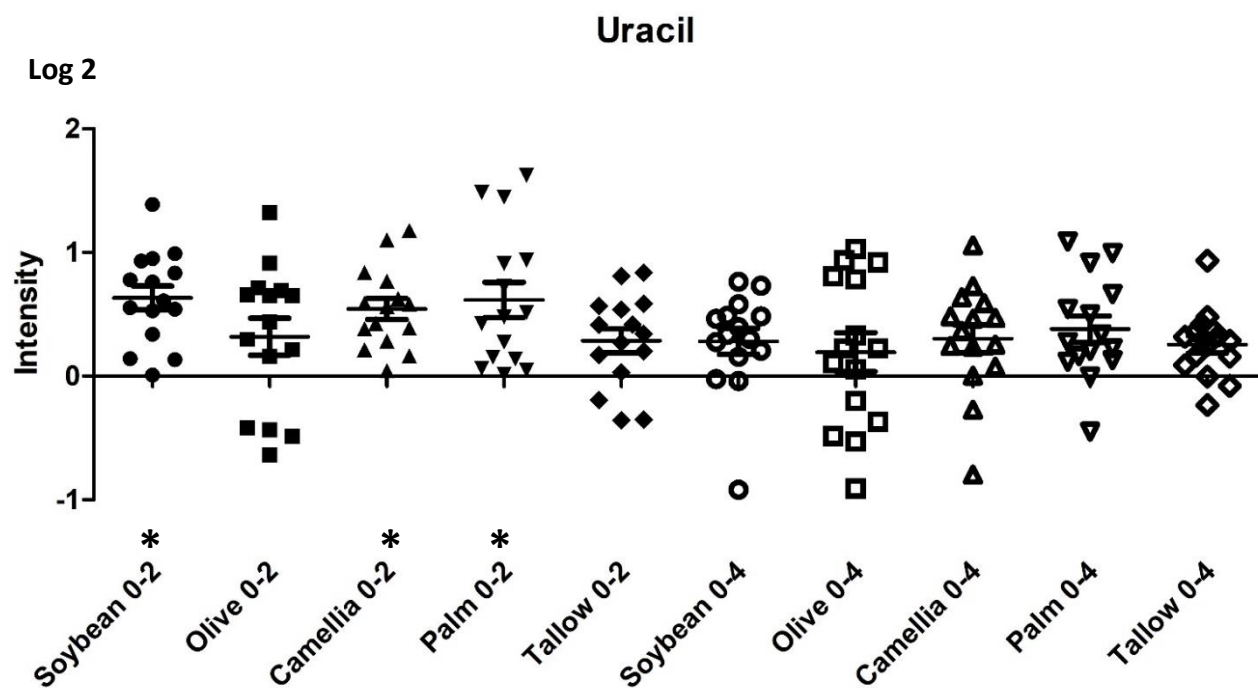

Supplemental Figure 7. Serum uracil differences between the control group (no oil added) and experimental groups (consuming various oils) after the test milkshake intake (conc). \*P < 0.05; Wilcoxon sign- rank test.

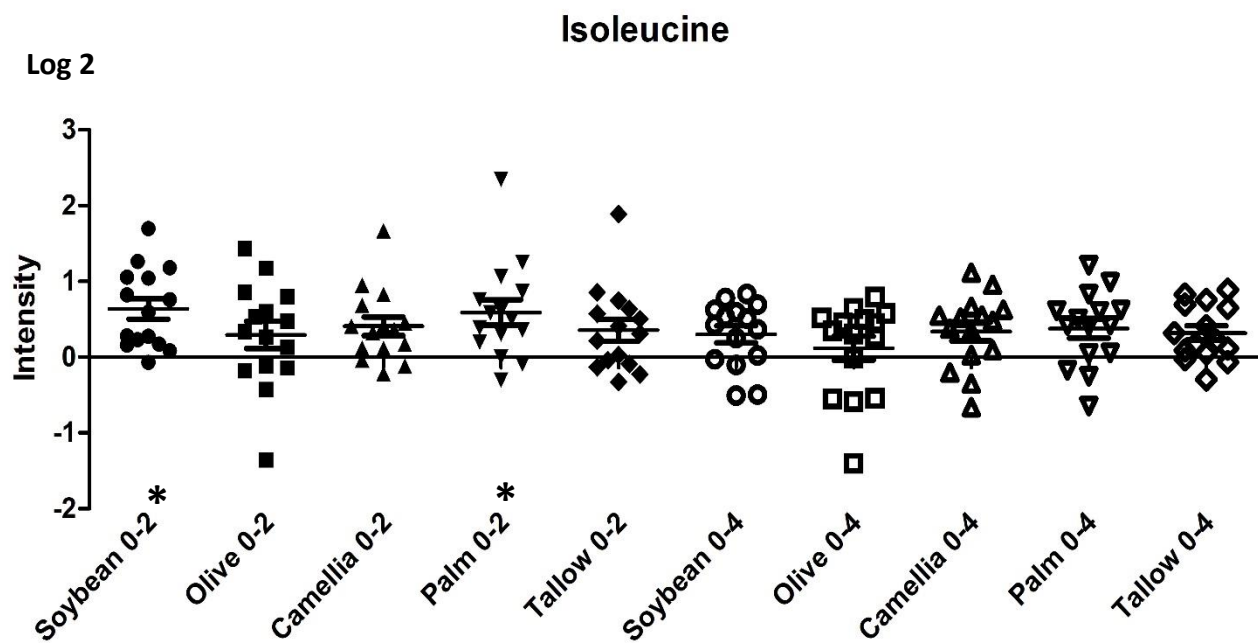

Supplemental Figure 8. Serum isoleucine differences between the control group (no oil added) and experimental groups (consuming various oils) after the test milkshake intake (conc). \*P < 0.05; Wilcoxon sign- rank test.



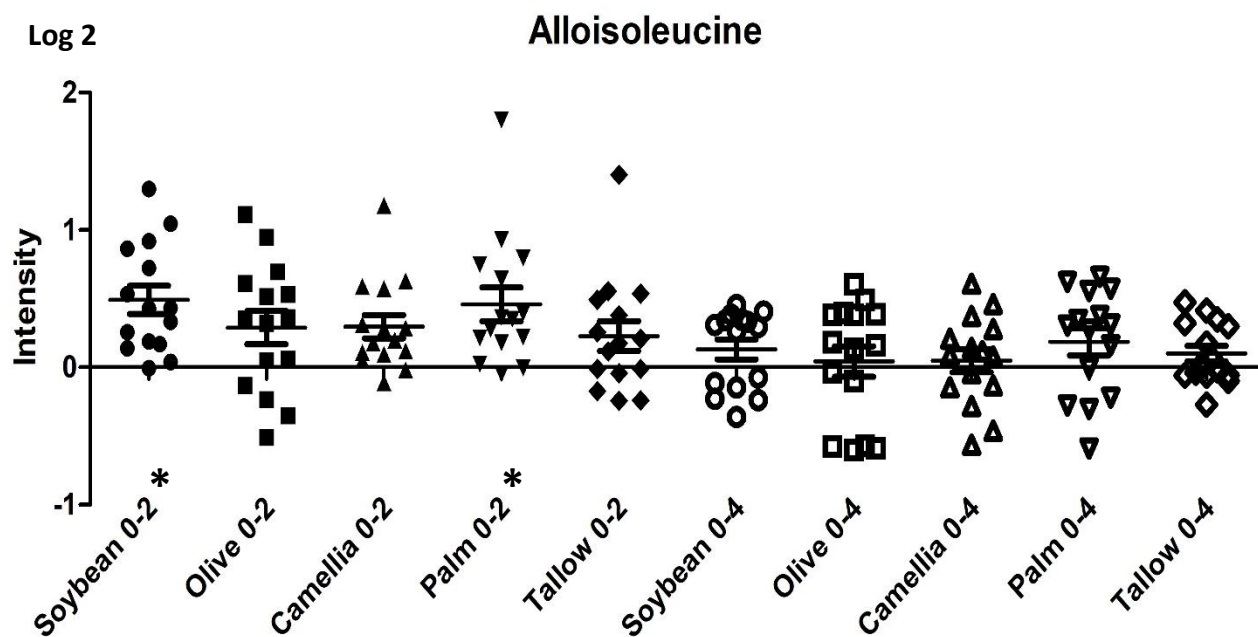

Supplemental Figure 9. Serum alloisoleucine differences between the control group (no oil added) and experimental groups (consuming various oils) after the test milkshake intake (conc). \*P < 0.05; Wilcoxon sign- rank test.

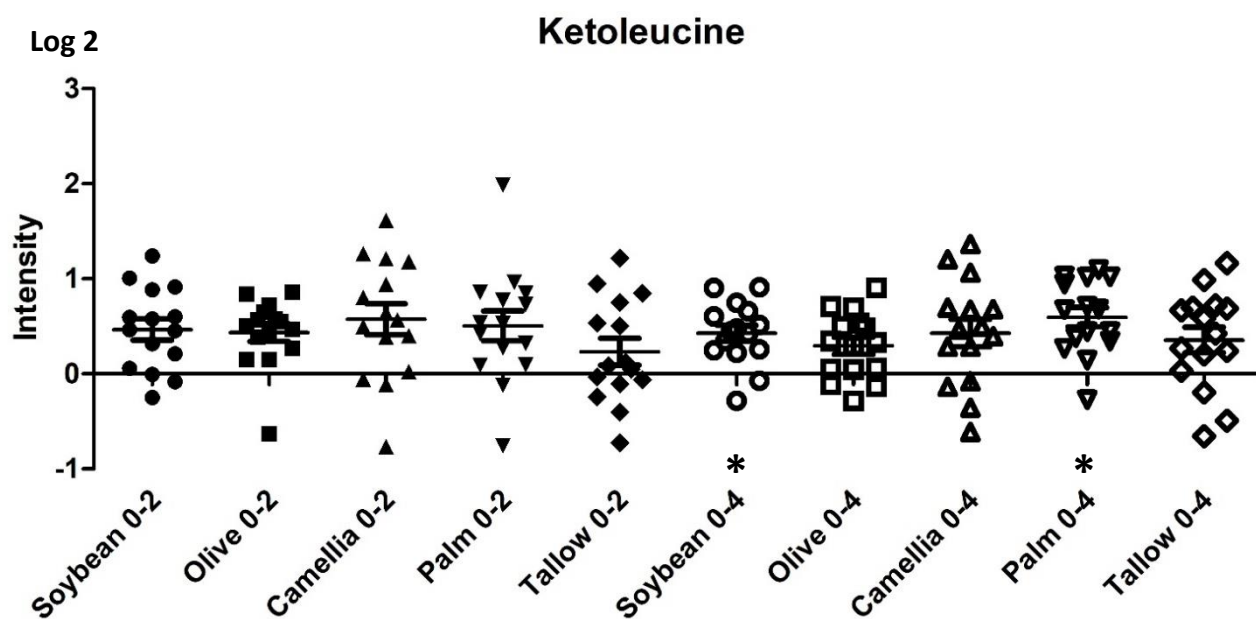

Supplemental Figure 10. Serum ketoleucine differences between the control group (no oil added) and experimental groups (consuming various oils) after the test milkshake intake (conc). \* $P < 0.05$ ; Wilcoxon sign- rank test.

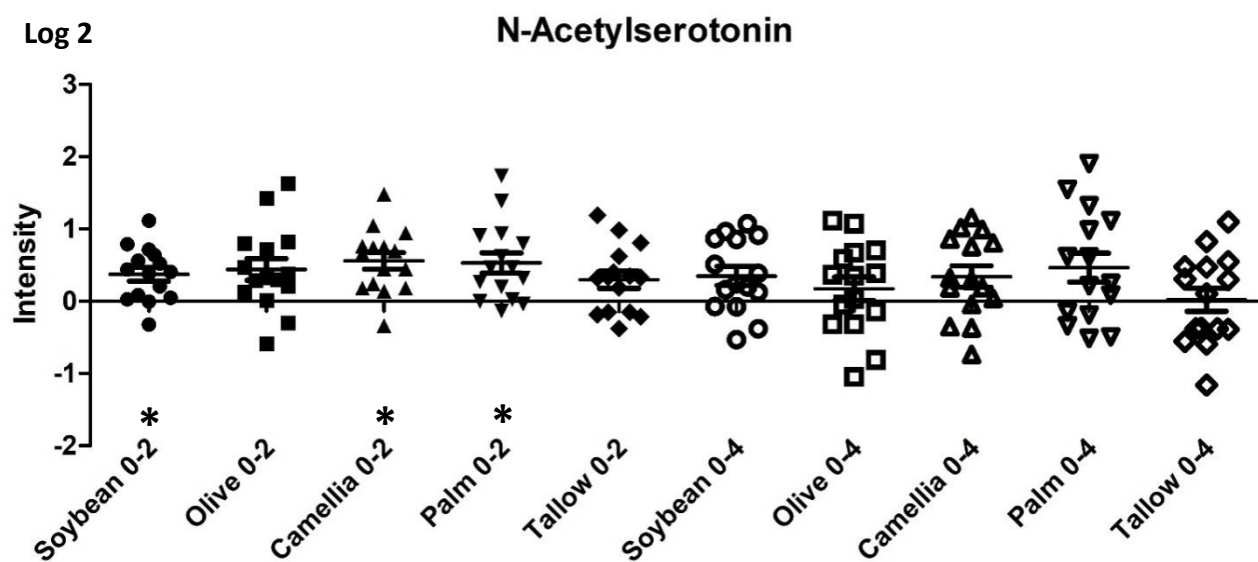

Supplemental Figure 11. Serum N-acetylserotonin differences between the control group (no oil added) and experimental groups (consuming various oils) after the test milkshake intake (conc). \* $P < 0.05$ ; Wilcoxon sign- rank test.

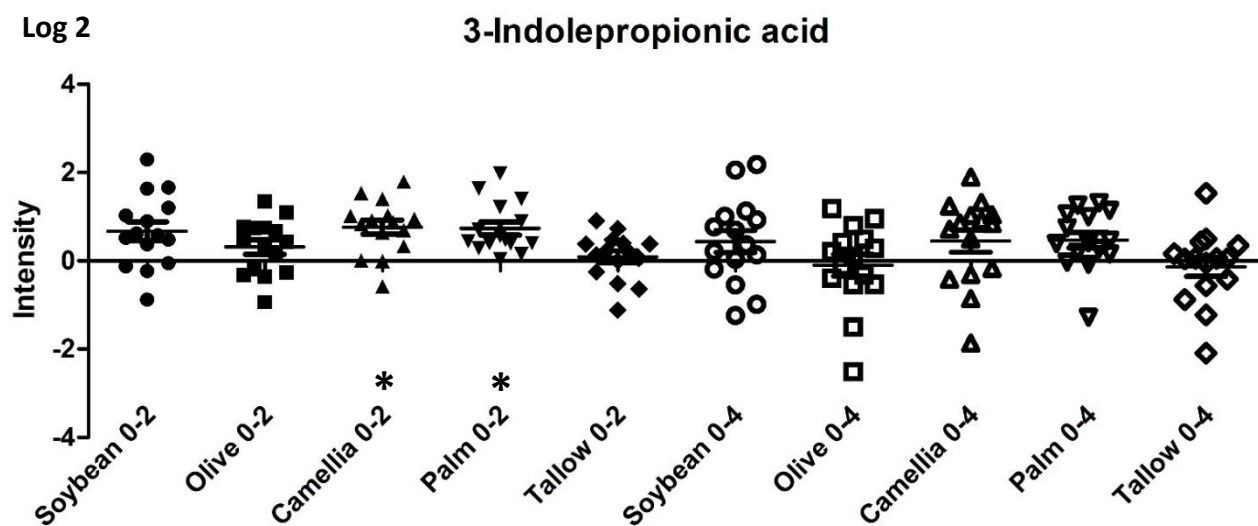

Supplemental Figure 12. Serum 3-indolepropionic acid differences between the control group (no oil added) and experimental groups (consuming various oils) after the test milkshake intake (conc.). \*P < 0.05; Wilcoxon sign- rank test.

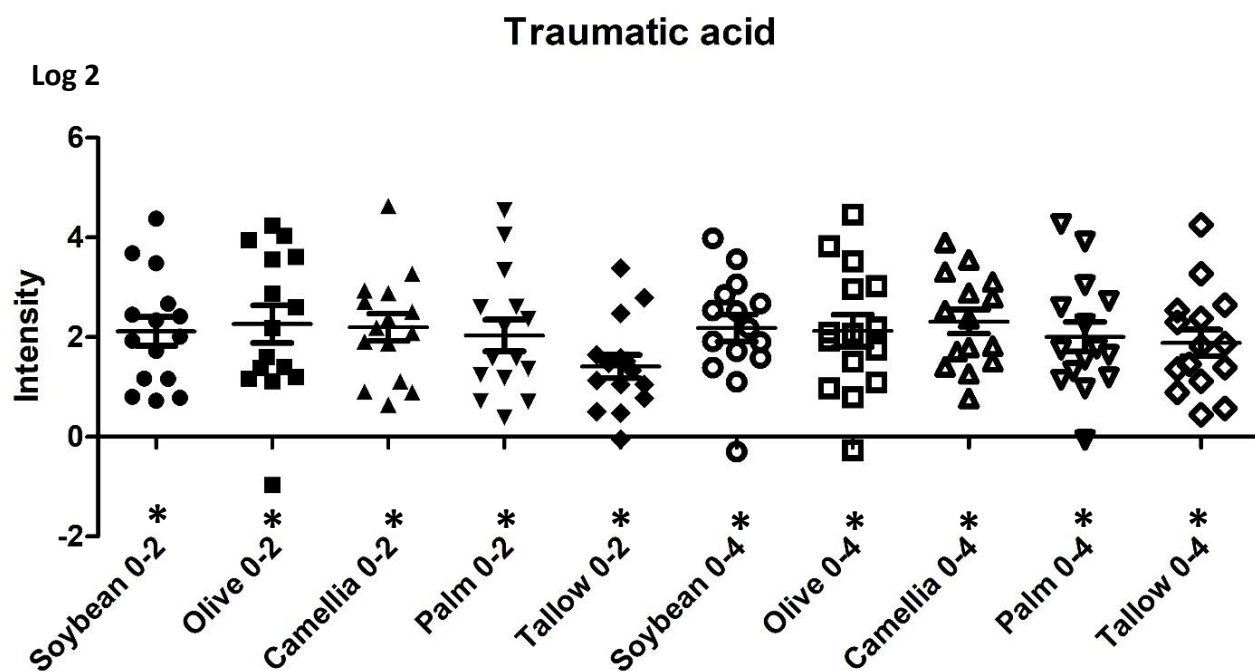

Supplemental Figure 13. Serum traumatic acid differences between the control group (no oil added) and experimental groups (consuming various oils) after the test milkshake intake (conc.). \*P < 0.05; Wilcoxon sign- rank test.

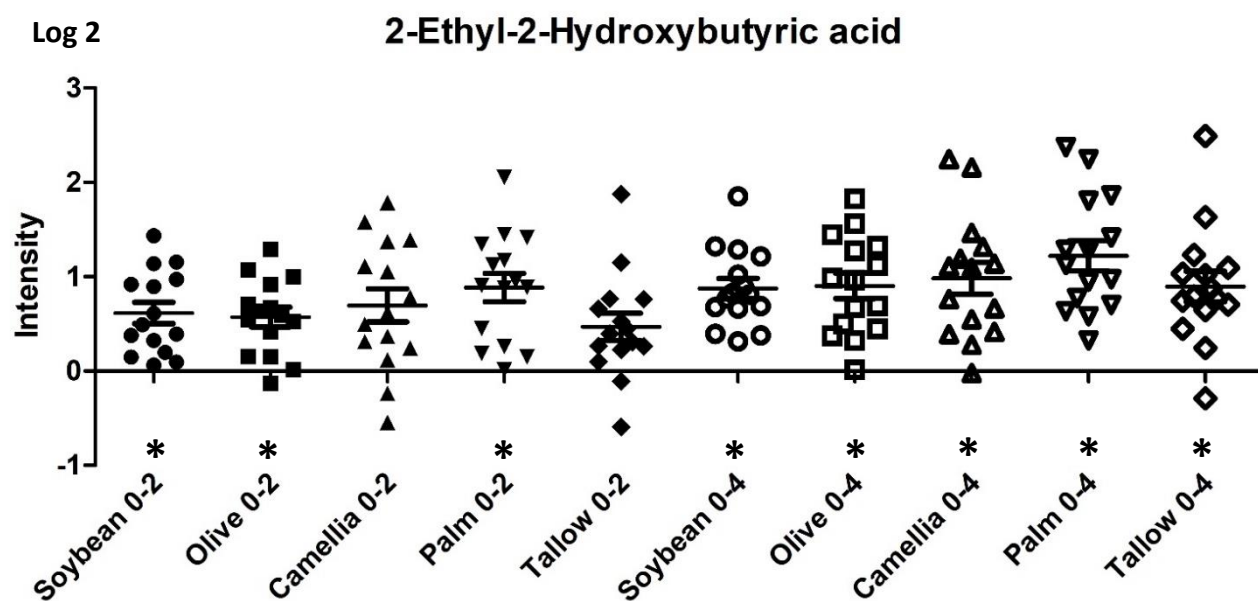

Supplemental Figure 14. Serum 2-Ethyl-2-Hydroxybutyric acid differences between the control group (no oil added) and experimental groups (consuming various oils) after the test milkshake intake (conc.). \*P < 0.05; Wilcoxon sign- rank test.

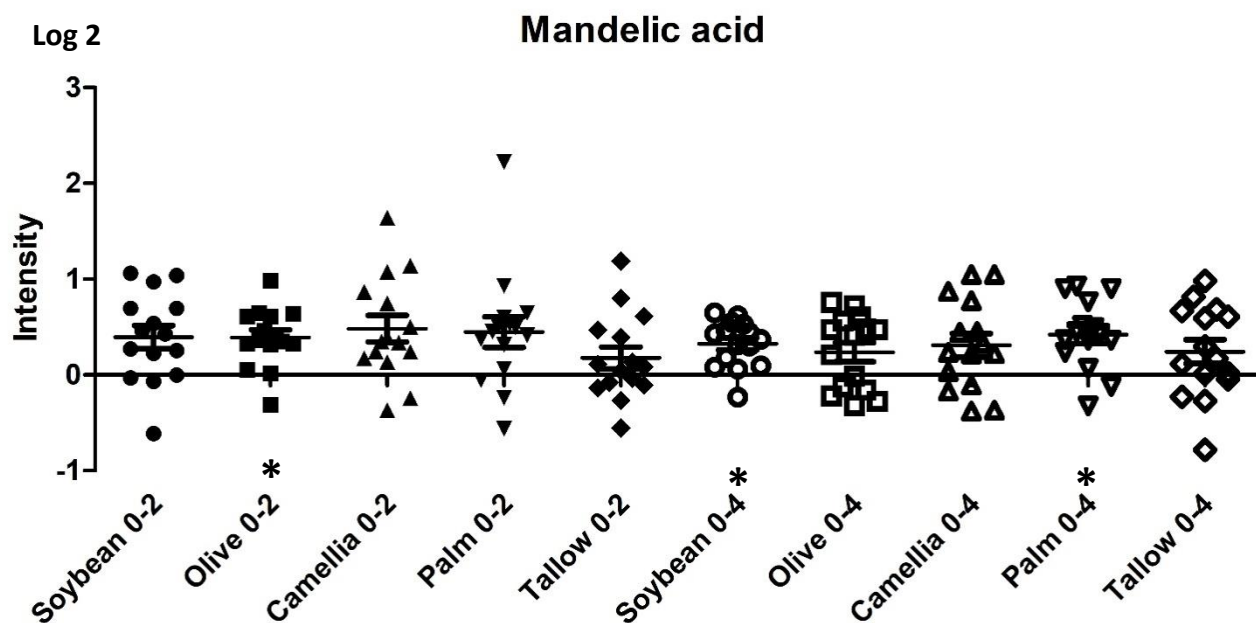

Supplemental Figure 15. Serum mandelic acid differences between the control group (no oil added) and experimental groups (consuming various oils) after the test milkshake intake (conc.). \*P < 0.05; Wilcoxon sign- rank test.

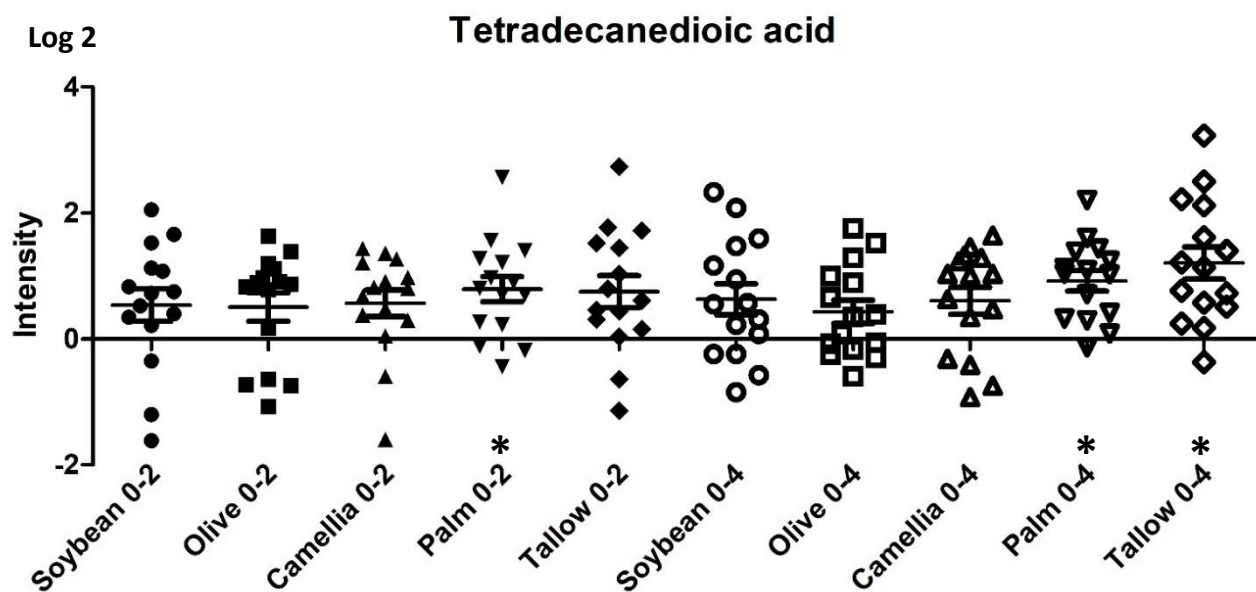

Supplemental Figure 16. Serum tetradecanedioic acid differences between the control group (no oil added) and experimental groups (consuming various oils) after the test milkshake intake (conc.). \*P < 0.05; Wilcoxon sign- rank test.



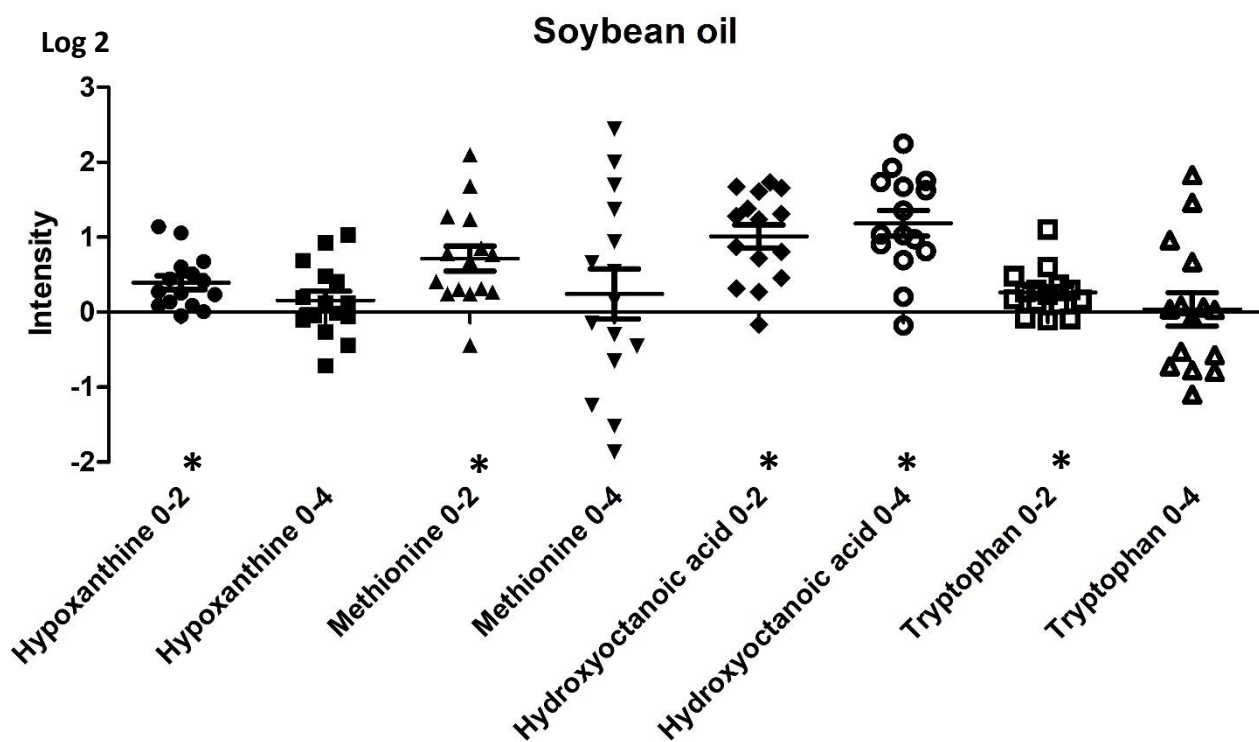

Supplemental Figure 17. Serum metabolite differences between the control group and soybean oil groups after the test milkshake intake. \* $P < 0.05$ ; Wilcoxon sign- rank test.

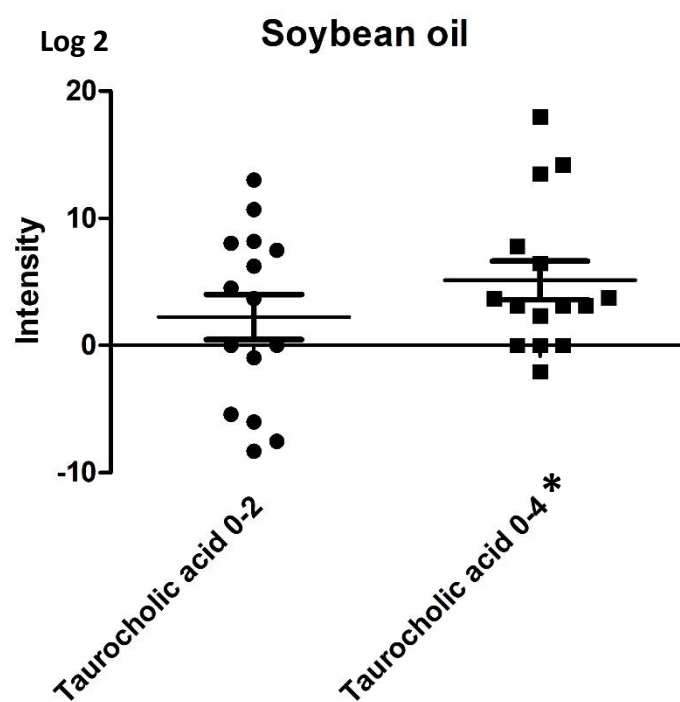

Supplemental Figure 18. Serum taurocholate differences between the control group and soybean oil groups after the test milkshake intake. \* $P < 0.05$ ; Wilcoxon sign- rank test.

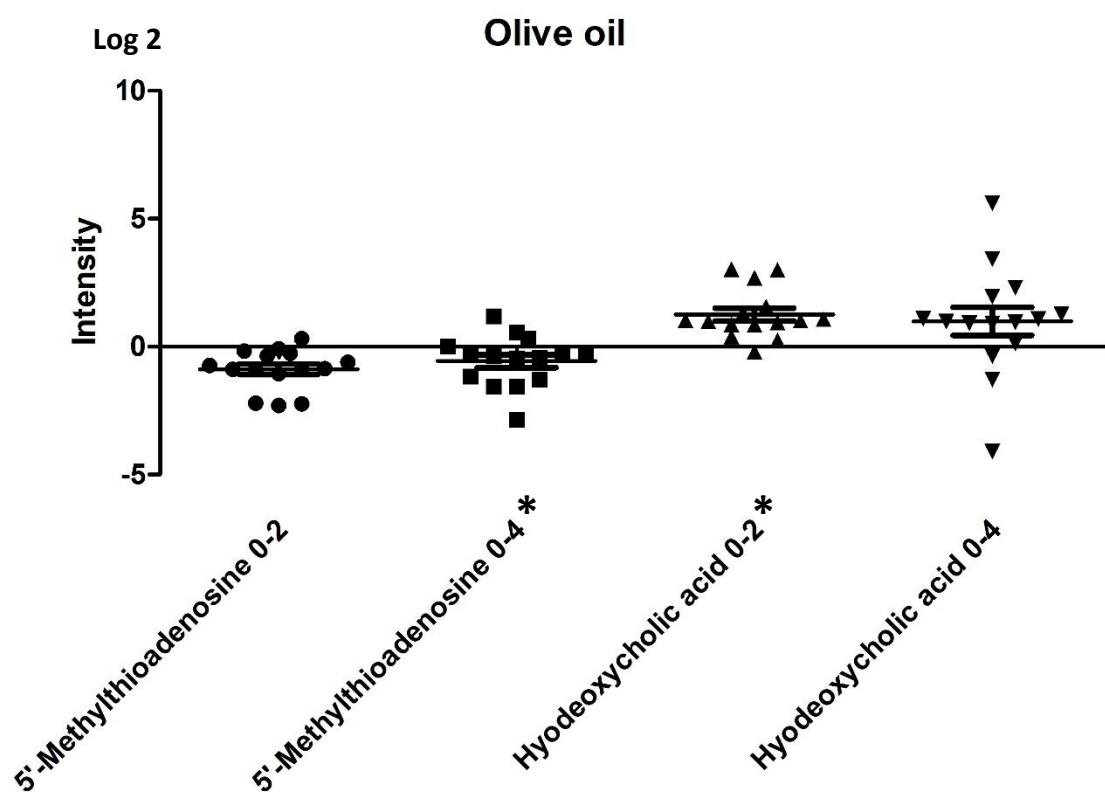

Supplemental Figure 19. Serum metabolite differences between the control group and olive oil groups after the test milkshake intake. \*P < 0.05; Wilcoxon sign- rank test.

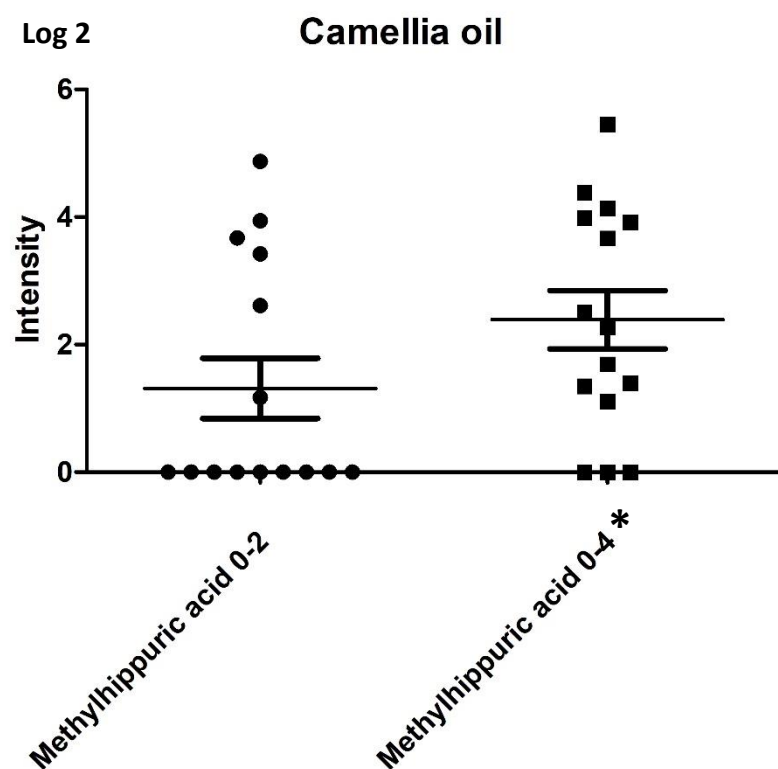

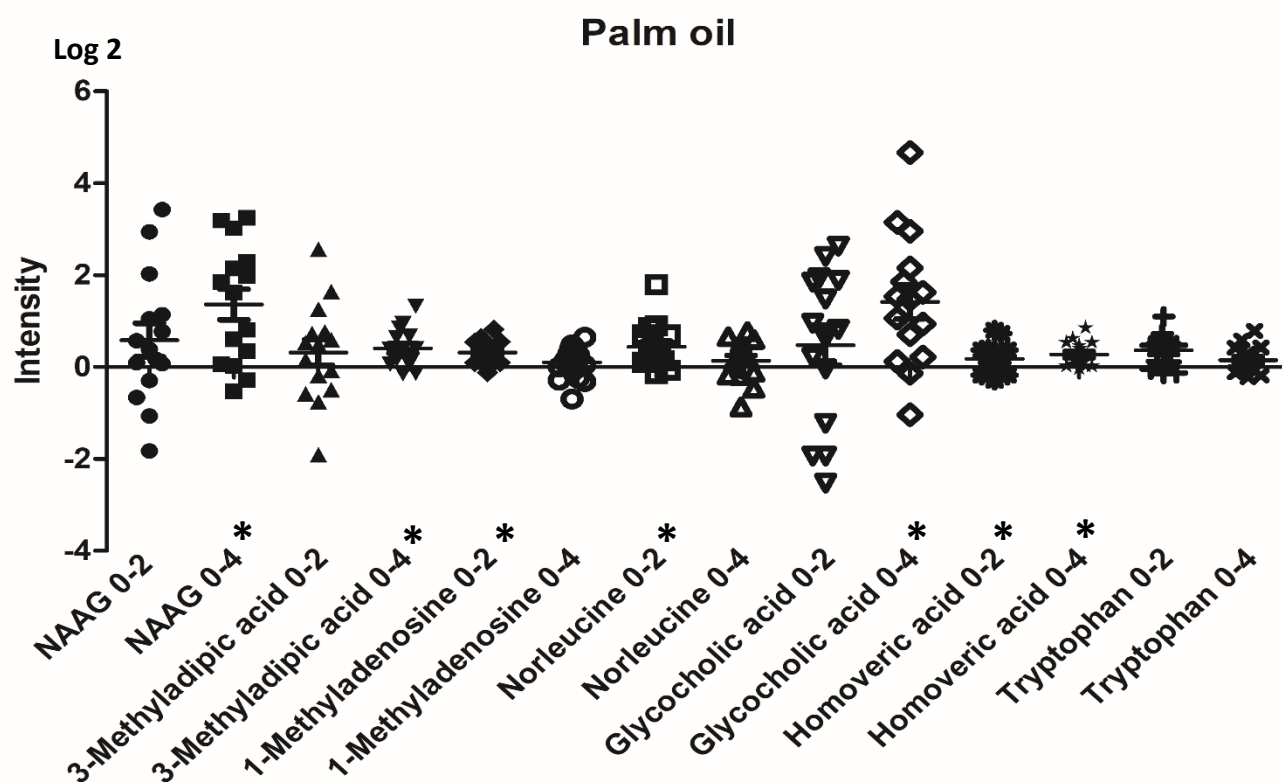

Supplemental Figure 21. Serum metabolites differences between the control group and palm oil groups after the test milkshake intake. \*P < 0.05; Wilcoxon sign- rank test.

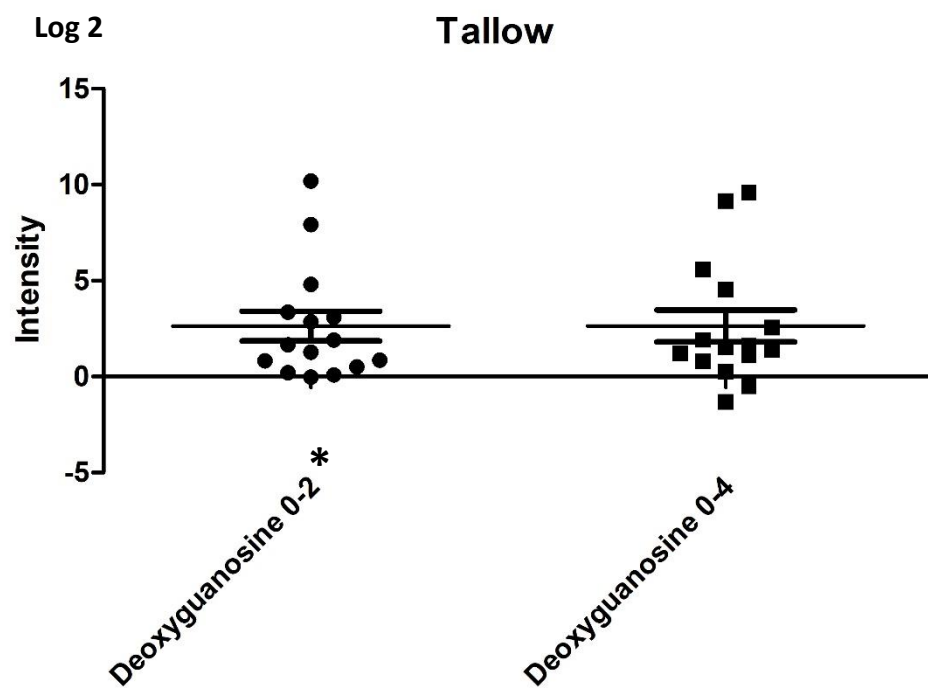

Supplemental Figure 22. Serum deoxyguanosine differences between the control group and tallow groups after the test milkshake intake. \*P <0.05; Wilcoxon sign- rank test.

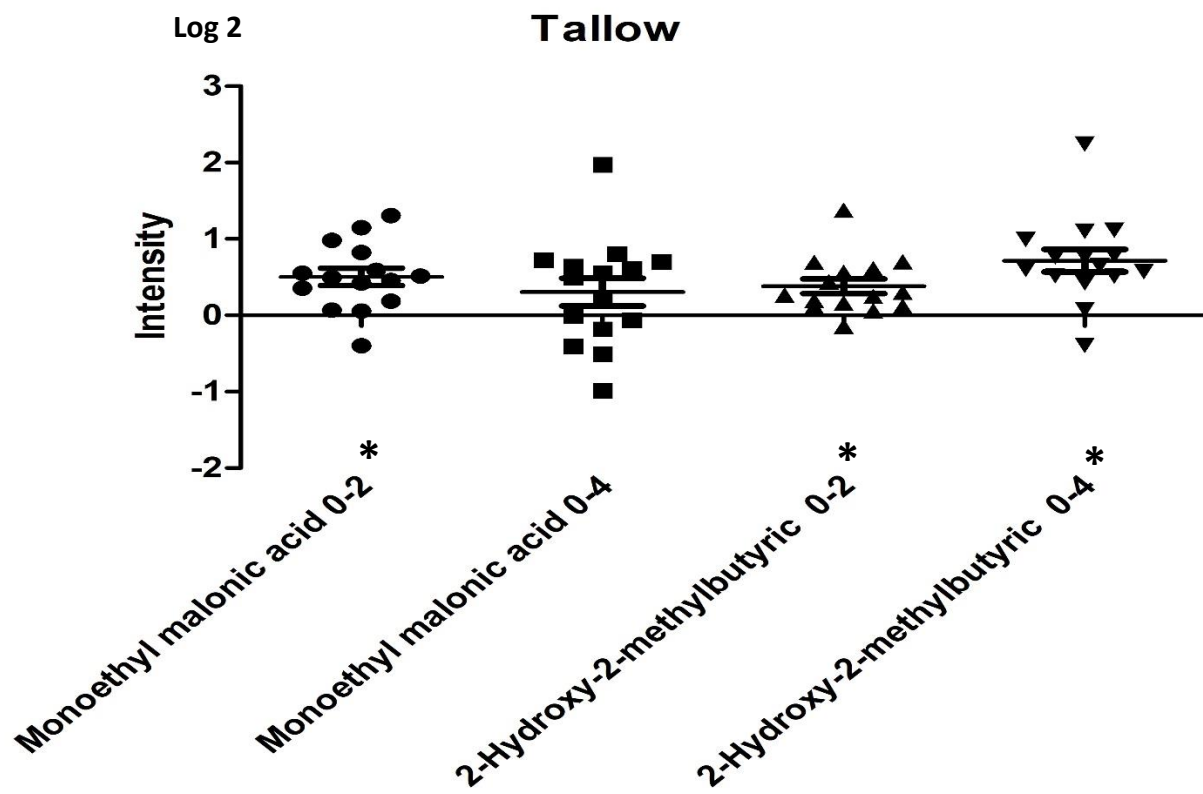

Supplemental Figure 23. Serum metabolites differences between the control group and tallow groups after the test milkshake intake. \*P < 0.05; Wilcoxon sign- rank test.
